# Horizontal acquisition followed by expansion and diversification of toxin-related genes in deep-sea bivalve symbionts

Lizbeth Sayavedra<sup>1,2#</sup>, Rebecca Ansorge<sup>1</sup>, Maxim Rubin-Blum<sup>1,3</sup>, Nikolaus Leisch<sup>1</sup>, Nicole Dubilier<sup>1,4</sup>, Jillian M. Petersen<sup>1,5,#</sup>

<sup>1</sup>Max Planck Institute for Marine Microbiology, Celsiusstrasse 1, 28359 Bremen, Germany

<sup>2</sup>Quadram Institute Bioscience, Norwich Research Park, Norwich, United Kingdom

<sup>3</sup>Israel Limnology and Oceanography Research, Tel Shikmona, 3108000, Haifa, Israel

<sup>4</sup>MARUM, University of Bremen, Leobener Str. 2, 28359 Bremen, Germany

<sup>5</sup>Division of Microbial Ecology, Department of Microbiology and Ecosystem Science, Research Network Chemistry Meets Microbiology, University of Vienna, Althanstrasse 14, 1090 Vienna, Austria

#Corresponding authors

## Key words

*Bathymodiolus*, symbiosis, toxin genes, host-symbiont interactions, sulfur-oxidizing bacteria

## Abstract

Deep-sea bathymodioline mussels gain their nutrition from intracellular bacterial symbionts. Their sulfur-oxidizing (SOX) symbionts were recently shown to encode abundant toxin-related genes (TRGs) in their genomes, which may play a role in beneficial host-microbe interactions. Here, we compared TRGs in the genomes of SOX symbionts from 10 bathymodioline mussel and two sponge species to better understand their potential functions and evolutionary origins. Despite the close phylogenetic relatedness of these symbionts, the number and classes of encoded toxins varied greatly between host species. One of the TRG classes, YDs, has experienced gene expansions multiple times, suggesting that these genes are under adaptive selection. Some symbiont genomes contained secretion systems, which can play a role in host-microbe interactions. Both TRGs and secretion systems had a heterogeneous distribution, suggesting that these closely related bacteria have acquired different molecular

30 mechanisms for interacting with the same family of animal hosts, possibly through convergent  
31 evolution.

## 32 **Introduction**

33 Beneficial associations between animals and bacteria are virtually universal (McFall-  
34 Ngai et al. 2013). Many beneficial bacteria are acquired from the environment during host  
35 development, but the mechanisms that underpin host-symbiont recognition, invasion of host  
36 tissues or cells, and maintenance of the associations, are still not well understood (Pel and  
37 Pieterse 2013). In contrast, the molecular mechanisms pathogens use to interact with their hosts  
38 have been intensively studied (e.g. Sansonetti 2002; Di Genova and Tonelli 2016; Kaufmann  
39 and Dorhoi 2016; Kendall and Sperandio 2016). A number of pathogen-encoded proteins that  
40 interfere with host cell activity have been described and characterized as toxins (Lang et al.  
41 2010; Aktories 2011; Huber et al. 2016). Large-scale bacterial genome sequencing has revealed  
42 toxin-related genes (TRGs) in the genomes of many beneficial bacteria with homology to  
43 characterized toxins of pathogens. This suggests that pathogens and beneficial bacteria use  
44 similar molecular mechanisms to interact with their hosts (Moya et al. 2008; Pérez-Brocal et  
45 al. 2011).

46 Bathymodioline mussels thrive at deep-sea hydrothermal vents and cold seeps by  
47 gaining nutrition from intracellular sulfur- and methane-oxidizing bacteria, which they harbor  
48 in their gill cells (Fisher et al. 1987; Duperron et al. 2009; Ponnudurai et al. 2016). Sayavedra  
49 et al. (2015) recently discovered diverse and abundant TRGs in the genomes of the sulfur-  
50 oxidizing (SOX) symbionts from two *Bathymodiolus* mussel species. These TRGs were  
51 hypothesized to play a role in beneficial host-microbe interactions, including host-symbiont  
52 communication and defense against parasites (Sayavedra et al., 2015). The sulfur-oxidizing  
53 (SOX) symbionts are acquired from the environment by each new host generation (Won et al.  
54 2003; Wentrup et al. 2014), but little is known about the mechanisms the symbionts use to  
55 invade and survive within host cells.

56 In this study, we investigated the distribution of toxin-related genes (TRGs) in the SOX  
57 symbionts of ten *Bathymodiolus* species and in the closely-related SOX symbionts of two deep-  
58 sea sponge species. We hypothesized that TRGs encoded by all symbionts associated with a  
59 certain animal group (mussels or sponges) would be essential for interactions with their animal  
60 host such as recognition and invasion of host cells. Furthermore, given that TRGs were most  
61 likely acquired by the SOX symbionts through horizontal gene transfer, we aimed to  
62 understand how TRG acquisition has influenced genome evolution in this closely-related group  
63 of symbiotic bacteria.

## 64 Results and Discussion

### 65 Phylogenomic analyses reveal two well-supported symbiont clades

66 Previously, genome sequences were available from the SOX symbionts of three  
67 bathymodioline species from vents in the Pacific and Atlantic Oceans (Ikuta et al. 2015;  
68 Sayavedra et al. 2015). We sequenced and assembled the draft genomes of SOX symbionts  
69 from seven additional mussel species from vents and seeps around the world (Table 1,  
70 Supplementary Table 1). Furthermore, we assembled SOX symbiont genomes from  
71 metagenomes of three poecilosclerid sponges from the Gulf of Mexico that co-occur with two  
72 of the bathymodioline species investigated in this study (Rubin-Blum et al. 2017). The draft  
73 genomes sequenced in this study were between 90.8 to 98.5% complete, and were sequenced  
74 to depths ranging from 24x to 3600x. Their estimated genome sizes ranged from 1.41 to 2.82  
75 Mbp. Many of these symbiont genomes may thus be larger than the only closed genome, that  
76 of the SOX symbiont of *B. septemdierum*, which is 1.47 Mbp (Ikuta et al. 2015).

77 We constructed a well-supported phylogenomic tree with 38 orthologous protein-  
78 coding genes from the sponge and mussel SOX symbionts and their close relatives. Consistent  
79 with previous 16S rRNA phylogenies, the SOX symbionts from mussels, sponges and clams  
80 did not form a monophyletic clade, as they were interspersed with free-living sulfur-oxidizing  
81 bacteria called ‘SUP05’ (Petersen et al. 2012; Sayavedra et al. 2015). The sponge-associated  
82 SOX symbionts formed a cluster together with most *Bathymodiolus* SOX symbionts, which we  
83 termed Clade 1 (Fig. 1 and Fig. 2). The symbionts of two mussel species, *B. heckeræ*  
84 (BheckSOX) and *B. sp. nov GoM* (BspGoMSOX), clustered in a separate well-supported clade,  
85 together with the cultivated sulfur oxidizer *Candidatus Thioglobus autotrophica* EF1 and  
86 SUP05 bacteria from the Pacific Northwest (Clade 2, Fig. 1). The intermixing of symbiotic and  
87 free-living bacteria in our phylogenomic analysis, and in previous 16S rRNA phylogenies,  
88 suggests that either 1) free-living SOX bacteria acquired the ability to associate with  
89 bathymodioline mussels multiple times or 2) the free-living bacteria that fall within the highly  
90 supported clade of SOX symbionts from mussels, sponges and clams evolved from a symbiotic  
91 ancestor. So far, there is no evidence that these symbionts have a free-living stage that is  
92 metabolically active, although very closely-related free-living bacteria from the SUP05/*Ca.*  
93 *Thioglobus* clade are often abundant in hydrothermal vent environments (Anantharaman et al.  
94 2012; Meier et al. 2017). In fact, the symbionts may rely on their hosts for some essential  
95 metabolites since they appear to lack two enzymes considered to be critical for anaplerotic  
96 metabolism (Ponnudurai et al. 2016). However, the isolate *Ca. Thioglobus autotrophica* also

97 lacks one of these central metabolic enzymes: malate dehydrogenase. Thus, a free-living  
98 existence may be possible without enzymes previously assumed to be essential. We cannot rule  
99 out either of our two explanations above, but clearly, the well-supported clustering of sponge  
100 and mussel symbionts suggests that they shared a common ancestor, possibly undergoing a  
101 host-switching event, as well as multiple lifestyle switches from free-living to symbiotic and  
102 possibly symbiotic to free-living.

### 103 **Horizontal acquisition, expansion and diversification of toxin-related** 104 **gene families**

105 SOX symbiont genomes from the two mussel species described by Sayavedra et al.  
106 (2015) encoded TRGs from three toxin classes: 1) RTX, or ‘repeat in toxin’ proteins, 2)  
107 MARTX toxins, which are large proteins containing multiple repeat motifs and domains of  
108 diverse functions, and 3) YD repeat toxins, named for their characteristic repeat sequence. In  
109 this study, we searched for TRGs in the SOX symbiont genomes of eight additional mussel  
110 species and two sponge species, as well as their closest free-living and symbiotic relatives  
111 (Table 1) (see SI Materials and Methods).

112 We consistently found TRGs in the SOX symbiont genomes of mussels and sponges,  
113 and these were highly abundant in the symbionts of mussel species (Fig. 1). In contrast, none  
114 of the genome sequences from bacteria closely related to the mussel and sponge SOX  
115 symbionts, such as free-living SUP05 and the vertically-transmitted, obligate intracellular  
116 symbionts of clams, encoded TRGs (Fig. 1).

117 **MARTX.** One toxin class, MARTX, was found in all of the mussel SOX symbiont  
118 genomes, regardless of whether they belonged to Clade 1 or 2. Intriguingly, MARTX were not  
119 found in any of the sponge symbiont genomes, even though these symbionts formed a highly-  
120 supported phylogenomic cluster together with mussel SOX symbionts. MARTX-like genes are  
121 known to be enriched in the genomes of symbiotic and pathogenic bacteria that associate with  
122 eukaryotes, and often have domains involved in attachment (Satchell 2011). The presence of  
123 MARTX-like genes in all mussel SOX symbionts from two distinct clades, and their absence  
124 in closely related free-living bacteria and the symbionts of clams and sponges, is consistent  
125 with a role in specific interactions with the mussel hosts, which could include attachment and  
126 recognition during colonization and intracellular infection of host gill cells. The length,  
127 sequences, domain content and arrangement of MARTX genes were highly diverse as shown  
128 previously for symbionts of two mussel species (Sayavedra et al. 2015) (Fig. 3). Despite this  
129 variable domain architecture, the symbionts of all 10 mussel species investigated had at least

130 one MARTX-like gene with domains involved in attachment such as haemmagglutinin,  
131 cadherin, and integrin, indicating their role in attachment to host cells (Supplementary Table  
132 2). If they are involved in attachment, they might also play a key role in mediating recognition  
133 and specificity. The mussel SOX symbioses are clearly highly specific: all except one of the  
134 known host species associate with only one or two 16S rRNA SOX types, which are not found  
135 in any other mussel species (see Duperron et al. 2008 for the only known exception). This host  
136 specificity is strictly maintained even when multiple mussel species co-occur, such as *B.*  
137 *brooksi* and *B. heckerae* at cold seeps in the Gulf of Mexico (Raggi et al. 2013). The highly  
138 divergent sequence and domain architectures of the MARTX genes in different symbiont  
139 lineages might be one of the mechanisms that determine this specificity. Although lacking  
140 MARTX genes, the SOX symbionts of sponges encoded proteins with leucine-rich repeats and  
141 cadherin domains, which have been hypothesized to play a role in recognition in shallow-water  
142 sponge symbioses (Thomas et al. 2010; Hentschel et al. 2012).

143 ***RTX and YD repeats.*** The second toxin class, RTX, was found in some but not all  
144 mussel and sponge symbionts from Clade 1, and not in any of the Clade 2 symbionts. The third  
145 class of genes, YDs, was found in all members of Clade 1 except the basal *B. septemdierum*  
146 symbiont (Fig. 1). Clade 2 symbionts did not contain any YD repeat genes, but these symbionts  
147 co-exist in a dual symbiosis with Clade 1 symbionts that did encode YD repeats (Fig. S1).  
148 These observations support the following hypotheses: I) RTX and YD repeats are not essential  
149 for establishing and maintaining an intracellular symbiotic association with mussels, II) RTX  
150 genes were acquired by the common ancestor of Clade 1 and lost on multiple occasions, III)  
151 YD genes were acquired by the common ancestor of Clade 1, and YD genes were subsequently  
152 lost in the *B. septemdierum* symbiont, and IV) gene duplication contributed to the expansion  
153 of the YD genes (SI Results and Discussion). Given that YD and RTX appear to not be essential  
154 for intracellular symbiosis, their main role might be to defend their hosts against possible  
155 pathogens or parasites (SI Results and Discussion).

156 ***Secretion system genes.*** Secretion systems (SS) are often essential for pathogens to  
157 survive inside host cells (Green and Meccas 2016). We therefore searched for SS components  
158 in the genomes of the SOX symbionts and their free-living relatives. We found genes encoding  
159 components of almost all known SS types. Like the TRGs, these SS components were patchily  
160 distributed among the SOX symbiont genomes, and not a single SS was specific to all of the  
161 intracellular bacteria (Supplementary Table 3).

162 All genome bins from SOX symbionts of Clades 1 and 2 encoded VgrG, a component  
163 of the type VI SS (T6SS). Although none of the genomes analyzed in this study encoded the  
164 full suite of T6SS genes, VrgG alone may allow the export of toxins without the full T6SS gene

165 array (Hachani et al. 2014). This gene was also present in some of the free-living SOX relatives.  
166 Three genes considered essential for T4SS were present in three of the thirteen SOX symbionts  
167 of Clade 1 and in both SOX symbionts of Clade 2, but not in any of the free-living or clam  
168 SOX. Most of the T4SS present in the mussel SOX symbionts encoded a relaxase that can  
169 interact with DNA, supporting a role in conjugation (Abby et al. 2016). In some pathogens, the  
170 same T4SS can carry out dual functions in conjugation and host colonization (Dehio 2008).

171 The BheckSOX of Clade 2 encoded an additional T4SS of the type VirB/D, which was  
172 not found in any other mussel SOX symbionts. The BheckSOX VirB/D-T4SS shares a similar  
173 genomic architecture with systems used for both conjugation (e.g. *Vibrio parahaemolyticus*),  
174 and for host cell invasion and persistence through secretion of toxic effectors (e.g. *Bartonella*  
175 *henselae* str. Houston-1) (Seubert et al. 2003; Schmid et al. 2004; Dehio 2008; Gokulan et al.  
176 2013). A phage integrase was found upstream of the VirB/D T4SS gene cluster, raising the  
177 possibility that, just as in pathogens, beneficial bacteria could be acquiring and exchanging  
178 secretion systems from bacteriophages (Guy et al. 2013).

## 179 **Conclusions**

180 The SOX symbionts of deep-sea mussels and sponges encoded a highly diverse array  
181 of toxin-related and secretion system genes. Our comparative genomic analyses identified only  
182 one toxin class, MARTX, which was common to all mussel SOX symbionts and might  
183 therefore be a gene class essential for host-microbe interactions such as recognition, attachment  
184 and symbiont uptake in the mussel symbioses. All other TRGs and secretion systems had a  
185 heterogeneous distribution in the symbionts we investigated, which attests to the complex and  
186 varied routes of genome evolution taken by the members of this closely-related group of  
187 symbiotic bacteria. If the SOX symbionts use their species-specific sets of TRGs and secretion  
188 systems to interact with their respective hosts, this would be an example of convergent  
189 evolution in which free-living bacteria took multiple unique evolutionary trajectories to  
190 become intracellular symbionts of animals, depending on the genes they acquired.

191 TRGs and T4SS that could export protein effectors were not present in free-living  
192 SUP05, even though these bacteria are often found in hydrothermal vent plumes in close  
193 proximity to mussels (Sylvan et al. 2012; Anantharaman et al. 2014). It is therefore likely that  
194 these genes were acquired from other free-living or host-associated bacteria. Gene flow  
195 between these bacterial donors, SUP05 bacteria, and SOX symbionts in a ‘free-living’ stage in  
196 the environment could lead to the evolution of novel symbiont and free-living lineages (SI  
197 Results and Discussion) (Roux et al. 2014, our own unpublished data). Further investigation of

198 horizontal gene transfer and genome evolution in groups of closely related bacteria such as the  
199 SUP05 and SOX symbionts, could reveal how free-living bacteria become symbionts.

200 Some pathogen groups such as *Pseudomonas aeruginosa* show a similar pattern to the SOX  
201 symbionts we investigated, with species- or strain-specific differences in their genomic  
202 complement of toxins and virulence factors (Huber et al. 2016). In *P. aeruginosa*, these  
203 genomic differences are clearly reflected in major phenotypic differences such as severity of  
204 human disease. At the morphological level, the SOX symbionts of different mussel and sponge  
205 species do not show clear differences. However, just as in pathogens, the underlying genomic  
206 variation between symbionts could result in differences in the way these diverse symbionts  
207 interact with their hosts. For example, some host species seem to consistently carry a higher  
208 symbiont load than others (Duperron et al. 2008; Raggi et al. 2013), and this could not only be  
209 due to differences in the availability of their energy sources, but also to differences in the rates  
210 of symbiont acquisition, maintenance, proliferation and digestion by the host. TRGs and SSS  
211 are likely to affect such host-microbe interactions and could thus have a significant impact on  
212 the functioning and stability of these symbioses (Huber et al. 2016).

## 213 **Acknowledgements**

214 We thank the captains, crews and funding agencies of the sampling cruises AT26-23,  
215 M64-2, M67-2, M78-2, ATA57, M114-2 and NA043. We thank Christian Borowski, Stephanie  
216 Markert, and Charles Fisher for providing samples, Brandon Seah for helpful discussions and  
217 Miriam Sadowski for technical assistance. This work was funded by the Max Planck Society,  
218 the DFG Cluster of Excellence "The Ocean in the Earth System" at MARUM (University of  
219 Bremen), a European Research Council Advanced Grant (BathyBiome, Grant 340535) and a  
220 Gordon and Betty Moore Foundation Marine Microbiology Initiative Investigator Award  
221 through Grant GBMF3811 to ND, the DAAD through a doctoral grant to LS, and the Vienna  
222 Science and Technology Fund (WWTF) through project VRG14-021 to JMP.

## 223 **Statement of competing interests**

224 The authors declare no competing interests.

## 225 **Author contributions**

226 LS, ND, and JP conceived the study; LS, RA, and MRB analyzed the data; NL did TEM  
227 analysis; LS and JP wrote the paper with contributions and revisions from all coauthors.

## 228           **References**

- 229    Abby SS, Cury J, Guglielmini J, Néron B, Touchon M, Rocha EPC. 2016. Identification of protein  
230           secretion systems in bacterial genomes. *Sci. Rep.* 6:23080.
- 231    Abby SS, Néron B, Ménager H, Touchon M, Rocha EPC. 2014. MacSyFinder: A Program to mine  
232           genomes for molecular systems with an application to CRISPR-Cas Systems. *PLOS ONE*  
233           9:e110726.
- 234    Aktories K. 2011. Bacterial protein toxins that modify host regulatory GTPases. *Nat. Rev. Microbiol.*  
235           9:487–498.
- 236    Albertsen M, Hugenholtz P, Skarshewski A, Nielsen KL, Tyson GW, Nielsen PH. 2013. Genome  
237           sequences of rare, uncultured bacteria obtained by differential coverage binning of multiple  
238           metagenomes. *Nat. Biotechnol.* 31:533–538.
- 239    Anantharaman K, Breier JA, Sheik CS, Dick GJ. 2012. Evidence for hydrogen oxidation and metabolic  
240           plasticity in widespread deep-sea sulfur-oxidizing bacteria. *Proc. Natl. Acad. Sci.* 110:330–335.
- 241    Anantharaman K, Duhaime MB, Breier JA, Wendt KA, Toner BM, Dick GJ. 2014. Sulfur oxidation  
242           genes in diverse deep-sea viruses. *Science* 344:757–760.
- 243    Assié A, Borowski C, van der Heijden K, Raggi L, Geier B, Leisch N, Schimak MP, Dubilier N,  
244           Petersen JM. 2016. A specific and widespread association between deep-sea *Bathymodiolus*  
245           mussels and a novel family of Epsilonproteobacteria. *Environ. Microbiol. Rep.* 8:805–813.
- 246    Aziz R, Bartels D, Best A, DeJongh M, Disz T, Edwards R, Formsma K, Gerdes S, Glass E, Kubal M,  
247           et al. 2008. The RAST Server: Rapid annotations using subsystems technology. *BMC*  
248           Genomics 9:75.
- 249    Boetzer M, Pirovano W. 2012. Toward almost closed genomes with GapFiller. *Genome Biol.* 13:R56.
- 250    Bouck J, Miller W, Gorrell JH, Muzny D, Gibbs RA. 1998. Analysis of the quality and utility of random  
251           shotgun sequencing at low redundancies. *Genome Res.* 8:1074–1084.
- 252    Buchfink B, Xie C, Huson DH. 2014. Fast and sensitive protein alignment using DIAMOND. *Nat.*  
253           Methods 12:59–60.
- 254    Dehio C. 2008. Infection-associated type IV secretion systems of *Bartonella* and their diverse roles in  
255           host cell interaction. *Cell. Microbiol.* 10:1591–1598.
- 256    Di Genova BM, Tonelli RR. 2016. Infection strategies of intestinal parasite pathogens and host cell  
257           responses. *Front. Microbiol.* [Internet] 7. Available from:  
258           <http://journal.frontiersin.org/article/10.3389/fmicb.2016.00256>
- 259    Domman D, Collingro A, Lagkouvardos I, Gehre L, Weinmaier T, Rattei T, Subtil A, Horn M. 2014.  
260           Massive expansion of ubiquitination-related gene families within the *Chlamydiae*. *Mol. Biol.*  
261           Evol. 31:2890–2904.
- 262    Dubilier N, Bergin C, Lott C. 2008. Symbiotic diversity in marine animals: The art of harnessing  
263           chemosynthesis. *Nat Rev Micro* 6:725–740.
- 264    Duperron S, Halary S, Lorion J, Sibuet M, Gaill F. 2008. Unexpected co-occurrence of six bacterial  
265           symbionts in the gills of the cold seep mussel *Idas* sp. (Bivalvia: Mytilidae). *Environ.*  
266           Microbiol. 10:433–445.



- 267 Duperron S, Lorion J, Samadi S, Gros O, Gaill F. 2009. Symbioses between deep-sea mussels  
268 (Mytilidae: Bathymodiolinae) and chemosynthetic bacteria: Diversity, function and evolution.  
269 C. R. Biol. 332:298–310.
- 270 Faure B, Schaeffer SW, Fisher CR. 2015. Species distribution and population connectivity of deep-sea  
271 mussels at hydrocarbon seeps in the Gulf of Mexico. PLoS ONE [Internet] 10. Available from:  
272 <http://www.ncbi.nlm.nih.gov/pmc/articles/PMC4393317/>
- 273 Fisher C, Childress J, Oremland R, Bidigare R. 1987. The importance of methane and thiosulfate in the  
274 metabolism of the bacterial symbionts of two deep-sea mussels. Mar. Biol. 96:59–71.
- 275 Fujiwara Y, Takai K, Uematsu K, Tsuchida S, Hunt J, Hashimoto J. 2000. Phylogenetic characterization  
276 of endosymbionts in three hydrothermal vent mussels: Influence on host distributions. Mar.  
277 Ecol. Prog. Ser. 208:147–155.
- 278 Gokulan K, Khare S, Rooney AW, Han J, Lynne AM, Foley SL. 2013. Impact of plasmids, including  
279 those encoding VirB4/D4 type IV secretion systems, on *Salmonella enterica* serovar Heidelberg  
280 virulence in macrophages and epithelial cells. PLOS ONE 8:e77866.
- 281 Green ER, Meccas J. 2016. Bacterial secretion systems – an overview. Microbiol. Spectr. [Internet] 4.  
282 Available from: <http://www.ncbi.nlm.nih.gov/pmc/articles/PMC4804464/>
- 283 Guy L, Nystedt B, Toft C, Zaremba-Niedzwiedzka K, Berglund EC, Granberg F, Näslund K, Eriksson  
284 A-S, Andersson SGE. 2013. A gene transfer agent and a dynamic repertoire of secretion  
285 systems hold the keys to the explosive radiation of the emerging pathogen *Bartonella*. PLOS  
286 Genet. 9:e1003393.
- 287 Hachani A, Allsopp LP, Oduko Y, Filloux A. 2014. The VgrG proteins are “à la Carte” delivery systems  
288 for bacterial Type VI effectors. J. Biol. Chem. 289:17872–17884.
- 289 Hentschel U, Piel J, Degnan SM, Taylor MW. 2012. Genomic insights into the marine sponge  
290 microbiome. Nat. Rev. Microbiol. 10:641–654.
- 291 Hillman K, Goodrich-Blair H. 2016. Are you my symbiont? Microbial polymorphic toxins and  
292 antimicrobial compounds as honest signals of beneficial symbiotic defensive traits. Curr. Opin.  
293 Microbiol. 31:184–190.
- 294 Huber P, Basso P, Reboud E, Attrée I. 2016. *Pseudomonas aeruginosa* renews its virulence factors.  
295 Environ. Microbiol. Rep. [Internet]. Available from:  
296 <http://onlinelibrary.wiley.com/doi/10.1111/1758-2229.12443/abstract>
- 297 Ikuta T, Takaki Y, Nagai Y, Shimamura S, Tsuda M, Kawagucci S, Aoki Y, Inoue K, Teruya M, Satou  
298 K, et al. 2015. Heterogeneous composition of key metabolic gene clusters in a vent mussel  
299 symbiont population. ISME J. [Internet]. Available from:  
300 <http://www.nature.com/doi/10.1038/ismej.2015.176>
- 301 Katoh K, Misawa K, Kuma K, Miyata T. 2002. MAFFT: A novel method for rapid multiple sequence  
302 alignment based on fast Fourier transform. Nucleic Acids Res. 30:3059–3066.
- 303 Kaufmann SHE, Dorhoi A. 2016. Molecular determinants in phagocyte-bacteria interactions. Immunity  
304 44:476–491.
- 305 Kearse M, Moir R, Wilson A, Stones-Havas S, Cheung M, Sturrock S, Buxton S, Cooper A, Markowitz  
306 S, Duran C, et al. 2012. Geneious basic: An integrated and extendable desktop software  
307 platform for the organization and analysis of sequence data. Bioinformatics 28:1647–1649.

- 308 Kendall MM, Sperandio V. 2016. What a dinner party! Mechanisms and functions of interkingdom  
309 signaling in host-pathogen associations. *mBio* 7:e01748-15.
- 310 Kuo C-H, Ochman H. 2009. The fate of new bacterial genes. *FEMS Microbiol. Rev.* 33:38–43.
- 311 Lang AE, Schmidt G, Schlosser A, Hey TD, Larrinua IM, Sheets JJ, Mannherz HG, Aktories K. 2010.  
312 *Photorhabdus luminescens* toxins ADP-Ribosylate actin and RhoA to force actin clustering.  
313 *Science* 327:1139–1142.
- 314 Li L. 2003. OrthoMCL: Identification of ortholog groups for eukaryotic genomes. *Genome Res.*  
315 13:2178–2189.
- 316 Luo R, Liu B, Xie Y, Li Z, Huang W, Yuan J, He G, Chen Y, Pan Q, Liu Yunjie, et al. 2012.  
317 SOAPdenovo2: An empirically improved memory-efficient short-read de novo assembler.  
318 *GigaScience* 1:18.
- 319 Marchler-Bauer A, Derbyshire MK, Gonzales NR, Lu S, Chitsaz F, Geer LY, Geer RC, He J, Gwadz  
320 M, Hurwitz DI, et al. 2014. CDD: NCBI’s conserved domain database. *Nucleic Acids*  
321 *Res.*:gku1221.
- 322 Markowitz VM, Chen I-MA, Palaniappan K, Chu K, Szeto E, Grechkin Y, Ratner A, Jacob B, Huang  
323 J, Williams P, et al. 2011. IMG: The integrated microbial genomes database and comparative  
324 analysis system. *Nucleic Acids Res.* 40:D115–D122.
- 325 Martinez J, Cogni R, Cao C, Smith S, Illingworth CJR, Jiggins FM. 2016. Addicted? Reduced host  
326 resistance in populations with defensive symbionts. *Proc. R. Soc. B Biol. Sci.* 283:20160778.
- 327 McDonald KL. 2014. Rapid embedding methods into epoxy and LR White resins for morphological  
328 and immunological analysis of cryofixed biological specimens. *Microsc. Microanal.* 20:152–  
329 163.
- 330 McDowell E, Trump B. 1976. Histologic fixatives suitable for diagnostic light and electron microscopy.  
331 *Arch. Pathol. Lab. Med.* 100:405–414.
- 332 McFall-Ngai M, Hadfield MG, Bosch TCG, Carey HV, Domazet-Lošo T, Douglas AE, Dubilier N,  
333 Eberl G, Fukami T, Gilbert SF, et al. 2013. Animals in a bacterial world, a new imperative for  
334 the life sciences. *Proc. Natl. Acad. Sci.* 110:3229–3236.
- 335 Meier DV, Pjevac P, Bach W, Hourdez S, Girguis PR, Vidoudez C, Amann R, Meyerdierks A. 2017.  
336 Niche partitioning of diverse sulfur-oxidizing bacteria at hydrothermal vents. *ISME J.*
- 337 Miller DJ, Hemmrich G, Ball EE, Hayward DC, Khalturin K, Funayama N, Agata K, Bosch T. 2007.  
338 The innate immune repertoire in Cnidaria-ancestral complexity and stochastic gene loss.  
339 *Genome Biol* 8:R59.
- 340 Montanaro J, Gruber D, Leisch N. 2016. Improved ultrastructure of marine invertebrates using non-  
341 toxic buffers. *PeerJ* 4:e1860.
- 342 Moore AD, Held A, Terrapon N, Weiner J, Bornberg-Bauer E. 2014. DoMosaics: Software for domain  
343 arrangement visualization and domain-centric analysis of proteins. *Bioinformatics* 30:282–283.
- 344 Moya A, Pereto J, Gil R, Latorre A. 2008. Learning how to live together: Genomic insights into  
345 prokaryote-animal symbioses. *Nat Rev Genet* 9:218–229.
- 346 Nelson DC, Hagen KD, Edwards DB. 1995. The gill symbiont of the hydrothermal vent mussel  
347 *Bathymodiolus thermophilus* is a psychrophilic, chemoautotrophic, sulfur bacterium. *Mar. Biol.*  
348 121:487–495.

- 349 Nuismer SL, Otto SP. 2004. Host–parasite interactions and the evolution of ploidy. *Proc. Natl. Acad.*  
350 *Sci. U. S. A.* 101:11036–11039.
- 351 Nurk S, Meleshko D, Korobeynikov A, Pevzner P. 2016. metaSPAdes: A new versatile de novo  
352 metagenomics assembler. ArXiv160403071 Q-Bio [Internet]. Available from:  
353 <http://arxiv.org/abs/1604.03071>
- 354 Pel MJC, Pieterse CMJ. 2013. Microbial recognition and evasion of host immunity. *J. Exp. Bot.*  
355 64:1237–1248.
- 356 Peng Y, Leung HCM, Yiu SM, Chin FYL. 2012. IDBA-UD: A de novo assembler for single-cell and  
357 metagenomic sequencing data with highly uneven depth. *Bioinformatics* 28:1420–1428.
- 358 Pérez-Brocá V, Latorre A, Moya A. 2011. Symbionts and pathogens: What is the difference? In:  
359 Dobrindt U, Hacker JH, Svanborg C, editors. *Between Pathogenicity and Commensalism*. Vol.  
360 358. Berlin, Heidelberg: Springer Berlin Heidelberg. p. 215–243. Available from:  
361 [http://link.springer.com/10.1007/82\\_2011\\_190](http://link.springer.com/10.1007/82_2011_190)
- 362 Petersen JM, Wentrup C, Verna C, Knittel K, Dubilier N. 2012. Origins and evolutionary flexibility of  
363 chemosynthetic symbionts from deep-sea animals. *Biol. Bull.* 223:123–137.
- 364 Ponnudurai R, Kleiner M, Sayavedra L, Petersen JM, Moche M, Otto A, Becher D, Takeuchi T, Satoh  
365 N, Dubilier N, et al. 2016. Metabolic and physiological interdependencies in the *Bathymodiolus*  
366 *azoricus* symbiosis. *ISME J.* [Internet]. Available from:  
367 <http://www.nature.com/doi/10.1038/ismej.2016.124>
- 368 Raggi L, Schubotz F, Hinrichs K-U, Dubilier N, Petersen JM. 2013. Bacterial symbionts of  
369 *Bathymodiolus* mussels and *Escarpia* tubeworms from Chapopote, an asphalt seep in the  
370 southern Gulf of Mexico. *Environ. Microbiol.* 15:1969–1987.
- 371 Rodriguez-R LM, Konstantinidis KT. 2016. The enveomics collection: A toolbox for specialized  
372 analyses of microbial genomes and metagenomes. Available from:  
373 <https://doi.org/10.7287/peerj.preprints.1900v1>
- 374 Ronquist F, Huelsenbeck JP. 2003. MrBayes 3: Bayesian phylogenetic inference under mixed models.  
375 *Bioinformatics* 19:1572–1574.
- 376 Roux S, Hawley AK, Beltran MT, Scofield M, Schwientek P, Stepanauskas R, Woyke T, Hallam SJ,  
377 Sullivan MB. 2014. Ecology and evolution of viruses infecting uncultivated SUP05 bacteria as  
378 revealed by single-cell- and meta- genomics. *Elife* 3.
- 379 Rubin-Blum M, Antony CP, Borowski C, Sayavedra L, Pape T, Sahling H, Bohrmann G, Kleiner M,  
380 Redmond MC, Valentine DL, et al. 2017. Short-chain alkanes fuel mussel and sponge  
381 *Cycloclasticus* symbionts from deep-sea gas and oil seeps. *Nat. Microbiol.* 2:17093.
- 382 Sansonetti P. 2002. Host–pathogen interactions: The seduction of molecular cross talk. *Gut* 50:iii2–iii8.
- 383 Satchell KJF. 2011. Structure and function of MARTX toxins and other large repetitive RTX proteins.  
384 *Annu. Rev. Microbiol.* 65:71–90.
- 385 Sayavedra L, Kleiner M, Ponnudurai R, Wetzel S, Pelletier E, Barbe V, Satoh N, Shoguchi E, Fink D,  
386 Breusing C, et al. 2015. Abundant toxin-related genes in the genomes of beneficial symbionts  
387 from deep-sea hydrothermal vent mussels. *eLife* [Internet] 4. Available from:  
388 <http://elifesciences.org/lookup/doi/10.7554/eLife.07966>

- 389 Schmid MC, Schulein R, Dehio M, Denecker G, Carena I, Dehio C. 2004. The VirB type IV secretion  
390 system of *Bartonella henselae* mediates invasion, proinflammatory activation and antiapoptotic  
391 protection of endothelial cells. *Mol. Microbiol.* 52:81–92.
- 392 Seah BKB, Gruber-Vodicka HR. 2015. Gbtools: Interactive visualization of metagenome bins in R.  
393 *Microb. Physiol. Metab.*:1451.
- 394 Seemann T. 2014. Prokka: Rapid prokaryotic genome annotation. *Bioinformatics* 30:2068–2069.
- 395 Seubert A, Hiestand R, De La Cruz F, Dehio C. 2003. A bacterial conjugation machinery recruited for  
396 pathogenesis. *Mol. Microbiol.* 49:1253–1266.
- 397 Stamatakis A. 2006. RAxML-VI-HPC: Maximum likelihood-based phylogenetic analyses with  
398 thousands of taxa and mixed models. *Bioinformatics* 22:2688.
- 399 Sun J, Zhang Yu, Xu T, Zhang Yang, Mu H, Zhang Yanjie, Lan Y, Fields CJ, Hui JHL, Zhang W, et  
400 al. 2017. Adaptation to deep-sea chemosynthetic environments as revealed by mussel genomes.  
401 *Nat. Ecol. Evol.* 1:0121.
- 402 Sylvan JB, Toner BM, Edwards KJ. 2012. Life and death of deep-sea vents: Bacterial diversity and  
403 ecosystem succession on inactive hydrothermal sulfides. *MBio* 3:e00279-11.
- 404 Tellier A, Moreno-Gómez S, Stephan W. 2014. Speed of adaptation and genomic footprints of host–  
405 parasite coevolution under arms race and trench warfare dynamics. *Evolution* 68:2211–2224.
- 406 Thomas T, Rusch D, DeMaere MZ, Yung PY, Lewis M, Halpern A, Heidelberg KB, Egan S, Steinberg  
407 PD, Kjelleberg S. 2010. Functional genomic signatures of sponge bacteria reveal unique and  
408 shared features of symbiosis. *ISME J.* 4:1557–1567.
- 409 Wentrup C, Wendeborg A, Schimak M, Borowski C, Dubilier N. 2014. Forever competent: Deep-sea  
410 bivalves are colonized by their chemosynthetic symbionts throughout their lifetime. *Environ.*  
411 *Microbiol.*:3699–3713.
- 412 Wick RR, Schultz MB, Zobel J, Holt KE. 2015. Bandage: Interactive visualization of *de novo* genome  
413 assemblies: Fig. 1. *Bioinformatics* 31:3350–3352.
- 414 Won YJ, Hallam SJ, O’Mullan GD, Pan IL, Buck KR, Vrijenhoek RC. 2003. Environmental acquisition  
415 of thiotrophic endosymbionts by deep-sea mussels of the genus *Bathymodiolus*. *Appl. Environ.*  
416 *Microbiol.* 69:6785.
- 417 Zhou J, Bruns MA, Tiedje JM. 1996. DNA recovery from soils of diverse composition. *Appl. Environ.*  
418 *Microbiol.* 62:316–322.

419 **Figures**

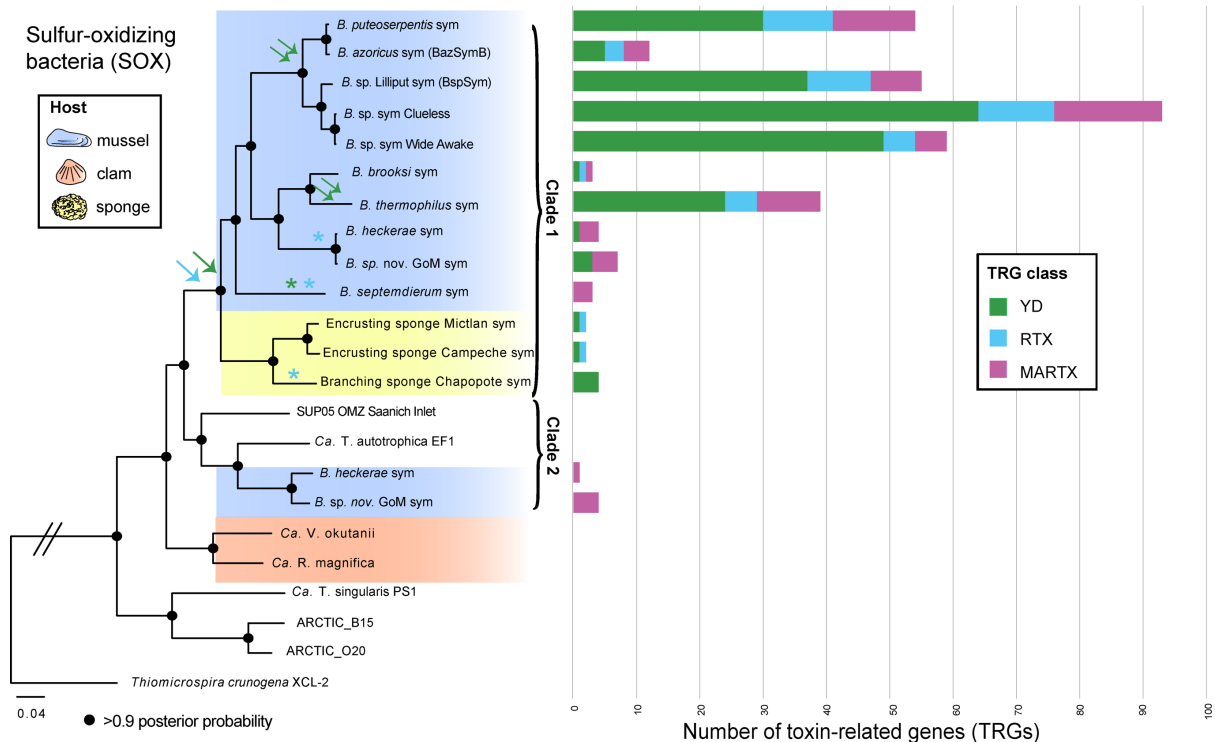

420

421 **Fig. 1.** Phylogenomic tree of symbiotic and free-living SOX, estimated with 38 orthologous protein-  
 422 coding genes, and the corresponding distribution of TRGs in these SOX. Filled circles represent a  
 423 posterior probability higher than 0.9. The blue arrow indicates the proposed acquisition of RTX genes,  
 424 green arrow of YD-repeat genes. All genomes shown in this tree were searched for all TRGs. Single  
 425 arrows represent possible gene acquisition; double arrows indicate possible gene duplications; asterisks  
 426 show possible gene loss events. The color of the arrows and stars corresponds to the TRG class. The  
 427 number of individuals sequenced per species and geographic location is shown in Supplementary Table  
 428 1. T = *Ca. Thioglobus*; B = *Bathymodiolus*; sym = symbiont.

429

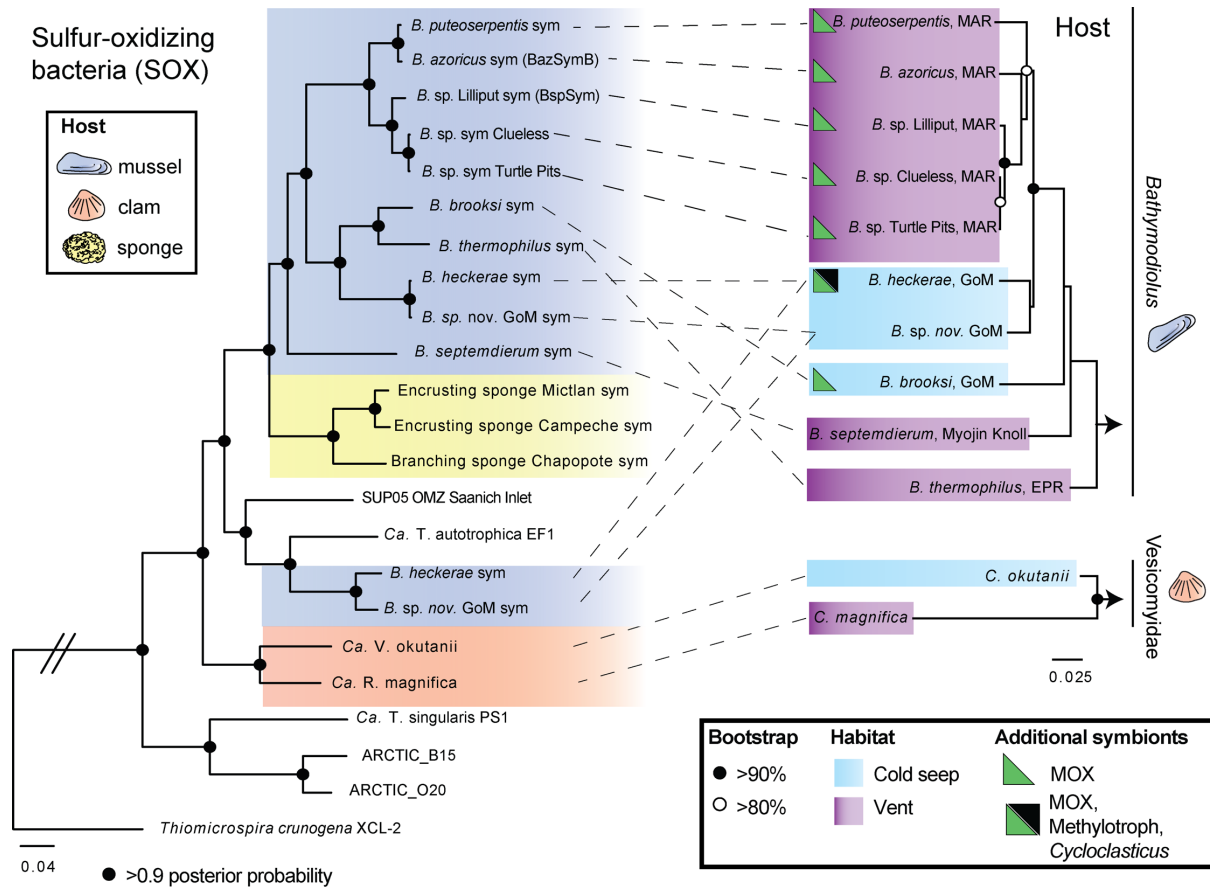

430

431

432

433

**Fig. 2.** Bivalve phylogeny and symbiont phylogeny. The maximum-likelihood host phylogeny was reconstructed based on cytochrome oxidase I (COI). Symbiont phylogeny was estimated with 38 orthologous protein-coding genes.

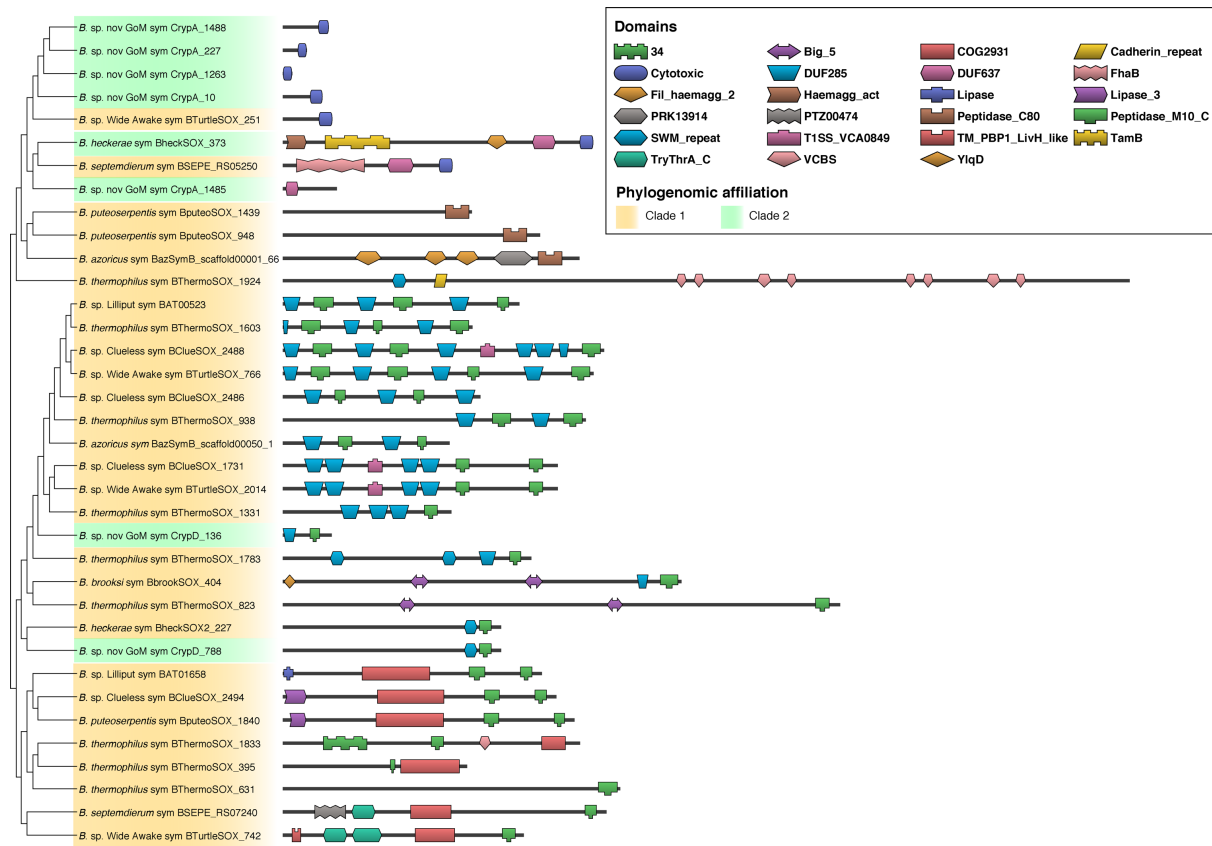

434

435 **Fig. 3.** Domain structure of MARTX-like genes that have the most similar domain architecture to the  
 436 MARTX-like genes from Clade 2 SOX symbionts (Fig. 1). The tree was estimated with the domain  
 437 distance among proteins with DoMosaics (Moore et al. 2014). The descriptions of these domains are  
 438 available in Supplementary Table 2. Locus tags of the MARTX genes from the SOX symbionts are  
 439 shown at the nodes.

440 **Tables**

441 **Table 1.** Overview of sulfur-oxidizing bacteria analyzed in this study.

| Organism                                           | Sampling site                                                        | Ecosystem                               | GC content (%) | Approx. Sequencing Depth (X) | Completeness (%) | Genome Size (Mbp) | No. of scaffolds (>1000 bp) |      |     |
|----------------------------------------------------|----------------------------------------------------------------------|-----------------------------------------|----------------|------------------------------|------------------|-------------------|-----------------------------|------|-----|
| <b>Host-associated</b>                             | <i>B. azoricus</i> symbiont <sup>1</sup>                             | Menez Gwen, MAR                         | Vent           | 38.20                        | 8                | 90.60             | 1.66                        | 239  |     |
|                                                    | <i>B. sp. 9° South</i> , Lilliput symbiont <sup>1</sup>              | 9°S, Lilliput, MAR                      | Vent           | 38.23                        | 22               | 95.39             | 2.29                        | 52   |     |
|                                                    | <i>B. thermophilus</i> symbiont <sup>1</sup>                         | Crab-Spa, EPR                           | Vent           | 38.4                         | 199              | 97.86             | 2.25                        | 149  |     |
|                                                    | <i>B. puteoserpentis</i> symbiont <sup>1</sup>                       | Logatchev, MAR                          | Vent           | 37.67                        | 3600             | 97.7              | 2.19                        | 77   |     |
|                                                    | <i>B. sp. 5° South</i> , Clueless symbiont <sup>1</sup>              | 5°S, Clueless, MAR                      | Vent           | 37.81                        | 102              | 98.52             | 2.43                        | 383  |     |
|                                                    | <i>B. sp. 5° South</i> , Wide Awake symbiont <sup>1</sup>            | 5°S, Wide Awake, MAR                    | Vent           | 37.76                        | 226              | 96.55             | 2.54                        | 382  |     |
|                                                    | <i>B. heckeriae</i> symbiont (Clade 2) <sup>1</sup>                  | Chapopote, GoM                          | Seep           | 37.41                        | 557              | 96.58             | 1.96                        | 236  |     |
|                                                    | <i>B. heckeriae</i> symbiont (Clade 1) <sup>1</sup>                  | Chapopote, GoM                          | Seep           | 38.82                        | 223              | 97.19             | 1.49                        | 110  |     |
|                                                    | <i>B. brooksi</i> symbiont <sup>1</sup>                              | Chapopote, GoM                          | Seep           | 36.63                        | 187              | 97.2              | 2.82                        | 374  |     |
|                                                    | <i>B. septemdiarum</i> symbiont <sup>2</sup>                         | Myojin Knoll                            | Vent           | 38.74                        | 505              | 98.68             | 1.47                        | 1    |     |
|                                                    | <i>B. sp. nov</i> GoM symbiont (Clade 2) <sup>1</sup> * <sup>3</sup> | DC673, GoM                              | Seep           | 36.91                        | 103              | 98.01             | 2.19                        | 322  |     |
|                                                    | <i>B. sp. nov</i> GoM symbiont (Clade 1) <sup>1</sup> * <sup>3</sup> | DC673, GoM                              | Seep           | 38.77                        | 26               | 90.83             | 1.41                        | 168  |     |
|                                                    | <i>C. okutani</i> <sup>3</sup>                                       | Sagami Bay                              | Seep           | 31.59                        | -                | 93.58             | 1.02                        | 1    |     |
|                                                    | <i>C. magnifica</i> <sup>4</sup>                                     | 9°N, EPR                                | Vent           | 34.03                        | -                | 94.84             | 1.16                        | 1    |     |
|                                                    | <b>Free-living</b>                                                   | Encrusting sponge symbiont <sup>9</sup> | Mictlan, GoM   | Seep                         | 38.77            | 50                | 96.89                       | 2.20 | 207 |
|                                                    |                                                                      | Encrusting sponge symbiont <sup>9</sup> | Chapopote, GoM | Seep                         | 38.71            | 50                | 96.03                       | 2.93 | 378 |
| Branching sponge symbiont <sup>9</sup>             |                                                                      | Chapopote, GoM                          | Seep           | 39.19                        | 500              | 95.2              | 2.09                        | 105  |     |
| SUP05 <sup>5</sup>                                 |                                                                      | Saanich Inlet                           | OMZ            | 39.29                        | -                | 85.76             | 1.37                        | 97   |     |
| <i>Candidatus T. singularis</i> PS1 <sup>6</sup>   | Puget Sound                                                          | Pelagic (5 m depth)                     | 37.44          | -                            | 98.68            | 1.71              | 1                           |      |     |
| <i>Candidatus T. autotrophica</i> EF1 <sup>7</sup> | Effingham Inlet                                                      | Pelagic, redox gradient (60 m depth)    | 39.14          | -                            | 99.18            | 1.51              | 1                           |      |     |
| <i>Thiomicrospira crunogena</i> XCL-2 <sup>8</sup> | EPR                                                                  | Vent                                    | 43.13          | -                            | 100              | 2.43              | 1                           |      |     |



*B.*, *Bathymodiolus*; *C.*, *Calyptogena*; T, Thioglobus; GoM, Gulf of Mexico; EPR, East Pacific Rise; MAR, Mid-Atlantic Ridge; OMZ, oxygen minimum zone.

\*Symbionts of this species were characterized in this study (SI Results and Discussion); <sup>+</sup>Sequenced in this study; <sup>1</sup>(Sayavedra *et al.*, 2015); <sup>2</sup>(Ikuta *et al.*, 2015); <sup>3</sup>(Kuwahara *et al.*, 2007); <sup>4</sup>(Newton *et al.*, 2007); <sup>5</sup>(Walsh *et al.*, 2009); <sup>6</sup>(Marshall and Morris, 2015); <sup>7</sup>(Shah and Morris, 2015); <sup>8</sup>(Scott *et al.*, 2006); <sup>9</sup>Sequenced by Rubin-Blum *et al.*, (2017), assembled in this study.
